# Supplementary material for: LSD1 inhibition circumvents glucocorticoid-induced muscle wasting of male mice
Source: Nat Commun. 2024 Apr 26;15:3563. doi: 10.1038/s41467-024-47846-9 (PMC11053113; doi:10.1038/s41467-024-47846-9)
Supplement: Supplementary file 4 — Source Data [file 41467_2024_47846_MOESM4_ESM.xlsx]

## Sheet: Fig. 1b
Figure 1b
					Anti-LSD1	Quantification
				LSD1	Input	1
					IP GR	1.93863
					IP LSD1	0.707189
					IgG	0.0691346
					Anti-GR	Quantification
					Input	1
				GR	IP GR	3.2577
					IP LSD1	0.889049
					IgG	0.269669

## Sheet: Fig. 1f
Figure 1f
reChIP-qPCR	GBSp1
% input	LSD1-reGR	LSD1-reIgG	GR-reLSD1	GR-reIgG
	0.001738	1.974e-05	0.006528	2.8876e-06
	0.003357	3.897e-05	0.00095524	6.717e-05
	0.004954	6.735e-05	0.001679	8.2685e-13
	0.000738	1.224e-05	0.0045575	6.85e-13
	0.003357	3.91e-05	0.007502	7.917e-05
	0.0017954	1.443e-05	0.005092	1.9503e-06
	GBSe1
	LSD1-reGR	LSD1-reIgG	GR-reLSD1	GR-reIgG
	0.0080136	9.208e-05	0.0098363	1.0818e-06
	0.0048365	4.039e-08	0.0081525	3.6722e-10
	0.0059052	0.00012533	0.00960121	6.316e-06
	0.0073349	4.9339e-07	0.00593514	9.0899e-06
	0.0057839	9.015e-07	0.0090752	5.4471e-06
	0.007503	3.3601e-07	0.0107502	5.3933e-05
	GBSe2
	LSD1-reGR	LSD1-reIgG	GR-reLSD1	GR-reIgG
	0.011496	8.2399e-06	0.0124109	3.7048e-06
	0.00718523	4.3935e-06	0.0109107	2.6053e-06
	0.0050298	4.1902e-07	0.0137206	1.8461e-07
	0.0120932	9.7153e-06	0.00934738	2.164e-05
	0.00860592	1.9993e-08	0.0110429	3.3608e-06
	0.0097251	6.1425e-08	0.0108677	6.2991e-06
	GBSe3
	LSD1-reGR	LSD1-reIgG	GR-reLSD1	GR-reIgG
	0.0062073	9.12336e-07	0.00593998	3.0247e-07
	0.0049323	2.39561e-07	0.00644102	8.9614e-07
	0.00356653	3.396e-07	0.0073174	9.8616e-10
	0.00347729	4.9715e-06	0.0091424	5.412e-06
	0.0054586	6.1575e-05	0.0084746	1.3176e-06
	0.007284	1.3604e-05	0.0057462	5.477e-07

## Sheet: Fig. 1h
Figure 1h
	Description	Size	Expect	Ratio	P Value	FDR
	Carbon metabolism	120	6.4242	3.5802	6.9404e-08	1.6544e-05
	FoxO signaling pathway	132	7.0666	3.3963	1.0308e-07	1.6544e-05
	Autophagy	130	6.9595	3.1611	1.2684e-06	0.00013572
	Cell cycle	123	6.5848	2.7336	8.7686e-05	0.0040949
	Mitophagy	63	3.3727	3.558	0.00010506	0.0042156
	Circadian rhythm	30	1.606	4.9812	0.00013041	0.0042156
	Insulin signaling pathway	140	7.4949	2.5351	0.00015759	0.0042156
	Protein processing in endoplasmic reticulum	163	8.7262	2.292	0.00042075	0.007029
	Chronic myeloid leukemia	76	4.0686	2.9494	0.00064927	0.0090645
	Insulin resistance	109	5.8353	2.5706	0.00065654	0.0090645

## Sheet: Fig. 1i
Figure 1i
	Description	Size	Expect	Ratio	P Value	FDR
	Focal Adhesion	185	5.1656	2.9038	0.00016672	0.030676
	Signaling of Hepatocyte Growth Factor Receptor	34	0.94935	5.2668	0.0022797	0.13982
	Focal Adhesion-PI3K-Akt-mTOR-signaling pathway	325	9.0747	1.9835	0.0036412	0.1675
	Inflammatory Response Pathway	30	0.83766	4.7752	0.0090562	0.33327
	Glutathione metabolism	20	0.55844	5.3721	0.017129	0.52529
	Fatty acid oxidation	10	0.27922	7.1628	0.030063	0.69145
	Novel Jun-Dmp1 Pathway	26	0.72597	4.1324	0.034617	0.70772
	Mecp2 and Associated Rett Syndrome	47	1.3123	3.048	0.041054	0.75539

## Sheet: Fig. 2d
Figure 2d
							Anti-LSD1	Quantification
							Input	1
							IgG	0.496876
							IP LSD1	1.72308
							IP NRF1	4.38736
							Lane	Quantification
						Input	1	0.237033
							2	1
							3	0.769114
						IP	IP LSD1	1.97179
							IP NRF1	1.25534
							IgG	0.181715

## Sheet: Fig. 2f
Figure 2f
													WT mice			Lsd1skm-/- mice
													Anti-GR	Quantification		Anti-GR	Quantification
													GR	1		GR	1
													NRF	1.81154		NRF	0.234459
													IgG	0.100598		IgG	0.0502132
													Anti-NRF1	Quantification		Anti-NRF1	Quantification
													GR	1		GR	1
													NRF	0.986702		NRF	9.49391
													IgG	0.027042		IgG	0.420494

## Sheet: Fig. 2g
Figure 2g
% input	Ddit4 GBSe2
	WT GR	WT Nrf1	WT IgG	Lsd1 KO GR	Lsd1 KO Nrf1	Lsd1 KO IgG
	0.0488281	0.0625	0.000919958	0.0519712	1.96359e-06	1.26883e-05
	0.0983355	0.0665231	0.00164677	0.0203879	0.00519712	4.57413e-05
	0.0709948	0.0268302	0.0014336	0.05055	0.00782295	1.40785e-05
	0.0478233	0.0168629	0.0070111	0.1011	0.00286337	6.2919e-05
	0.112178	0.075363	0.00340969	0.0267162	0.00917503	4.26781e-05
	Ddit4 GBSp1
	WT GR	WT Nrf1	WT IgG	Lsd1 KO GR	Lsd1 KO Nrf1	Lsd1 KO IgG
	0.0227577	0.103127	0.00541997	0.00031388	0.0962213	4.61393e-07
	0.0247316	0.0955566	0.00120437	0.000554125	0.107507	1.95341e-07
	0.0522835	0.134204	0.00367638	0.000193216	0.0512075	0.000114887
	0.00300692	0.0873227	4.61393e-07	0.000701388	0.0256038	4.61393e-07
	0.00605566	0.0634824	1.95341e-07	0.000155856	0.0218307	1.95341e-07
	Pax7
	WT GR	WT Nrf1	WT IgG	Lsd1 KO GR	Lsd1 KO Nrf1	Lsd1 KO IgG
	0.00929068	0.0575117	3.51024e-06	0.0316862	0.0130482	2.19097e-06
	0.0162885	0.00792156	1.28311e-05	0.0124303	0.0115978	8.57205e-05
	0.00860863	0.0127797	2.20326e-05	0.00770494	0.0119239	0.000106268
	0.0236831	0.00803214	0.000124635	0.0308198	0.0158431	0.000122919
	0.0132533	0.0147055	1.87532e-05	0.0174879	0.0130031	3.95764e-05

## Sheet: Fig. 2l
Figure 2l
	Description	Size	Expect	Ratio	P Value	FDR
	Ubiquitin mediated proteolysis	139	7.6429	3.5327	6.48e-09	2.08e-06
	Thermogenesis	230	12.647	2.6885	1e-07	1.6106e-05
	Circadian rhythm	30	1.6495	5.456	2.1532e-05	0.0023039
	Oxidative phosphorylation	134	7.368	2.443	0.0003681	0.01688
	RNA degradation	83	4.5637	2.8485	0.00054649	0.021928
	mTOR signaling pathway	153	8.4127	2.2585	0.0006945	0.024771
	Ferroptosis	41	2.2544	3.5486	0.0015052	0.034512
	Autophagy	130	7.148	2.2384	0.0019739	0.042242

## Sheet: Fig. 2m
Figure 2m
Fold change of gene expression	Ddit4					Fbxo31
normalized to siCtrl	siCT	siGR	siNRF1	siLSD1		siCT	siGR	siNRF1	siLSD1
	1.00639	0.380192	0.149095	0.7		0.71795	0.215231	0.702188	0.582265
	1.14058	0.417465	0.171459	0.61		0.696806	0.312941	0.327064	0.600668
	1.21512	0.402556	0.0969116	0.64		0.877881	0.255955	0.550052	0.470512
	1.40149	0.417465	0.104366	0.75		0.914439	0.276234	0.233418	0.421749
	0.762506	0.598606	0.387646	0.79		1.22097	0.233899	0.578837	0.439049
	0.734993	0.564131	0.328009	0.71		1.19672	0.257735	0.369779	0.482301
	0.738923	0.483457	0.72311	0.81		1.19453		0.867126	0.3451
						1.1807		0.799032	0.370516

## Sheet: Fig. 3a
Figure 3a
		Starved 0h			Starved 12h			Starved 24h
		Anti-LSD1	Quantification		Anti-LSD1	Quantification		Anti-LSD1	Quantification
		input	1		gr	1.73087		gr	3.71172
		igg	0.221237		lsd	1.34671		lsd	2.49758
		lsd	1.10953		igg	0.589855		igg	1.02184
		gr	2.68194		input	1		input	1
		Starved 0h			Starved 12h			Starved 24h
		Anti-GR	Quantification		Anti-GR	Quantification		Anti-GR	Quantification
		input	1		gr	1.40264		gr	1.46255
		igg	0.167673		lsd	1.58408		lsd	1.97367
		lsd	0.332403		igg	0.308716		igg	0.348737
		gr	1.20934		input	1		input	1

[truncated: 62 more sheets: Fig. 3b, Fig. 3c, Fig. 3d, Fig. 3e, Fig. 3f, Fig. 3g, Fig. 3h, Fig. 4c, Fig. 4d, Fig. 4e, Fig. 5a, Fig. 5b, Fig. 5c, Fig. 5d, Fig. 5e, Fig. 5f, Fig. 5g, Fig. 5h, Fig. 6b, Fig. 6c …]
